# Supplementary material
Source: publisher figshare collection journal article supplement (https://acs.figshare.com/ndownloader/files/5914755)
Supplement: Supplementary file 1 [file 5914755]

## Supporting Information

### Effect of Fluorination on Molecular Orientation of Conjugated Polymers in High Performance Field-Effect Transistors

By Andong Zhang, Chengyi Xiao, Yang Wu, Cheng Li,\* Yunjing Ji, Lin Li, Wenping Hu, Zhaohui Wang,\* Wei Ma,\* and Weiwei Li\*

<sup>†</sup> Beijing National Laboratory for Molecular Sciences, CAS Key Laboratory of Organic Solids, Institute of Chemistry, Chinese Academy of Sciences, Beijing, 10090, China. E-mail: wangzhaohui@iccas.ac.cn, licheng1987@iccas.ac.cn and liweiwei@iccas.ac.cn

<sup>‡</sup> State Key Laboratory for Mechanical Behavior of Materials, Xi'an Jiaotong University, Xi'an 710049, PR China. E-mail: msewma@xjtu.edu.cn

<sup>§</sup> College of Chemistry, Beijing Normal University, Beijing, 100875, PR China.

<sup>⊥</sup> University of Chinese Academy of Sciences, Beijing 100049, PR China.

## Contents

1. Materials and measurements
2. Synthesis of the monomers and polymers
3. Literature examples of fluorinated polymers for FETs
4. The chemical structures of PDPP4T-M and PFDPP4T-M
5. DFT Calculations
6. CV of the polymers
7. FETs
8. AFM
9. TGA of the DPP polymers
10. NMR spectra of the monomers and polymers
11. References

## 1. Materials and measurements

The synthesis of the monomer **6** and **9**, and the DPP polymers is shown in Scheme 1. All synthetic procedures were performed under argon atmosphere. Commercial chemicals were used as received. THF and toluene were distilled from sodium under an N<sub>2</sub> atmosphere. The monomer 3,6-bis(5-bromothiophen-2-yl)-2-(2-decyltetradecyl)-5-(tricosan-11-yl)-2,5-dihydropyrrolo[3,4-*c*]pyrrole-1,4-dione (**1**),<sup>S 1</sup> 3,6-Bis(4-methylthiophene-2-yl)pyrrolo[3,4-*c*]pyrrole-1,4(2*H*,5*H*)-dione (**4**),<sup>S 2</sup> 3-(4-methylthiophen-2-yl)-6-(thiophen-2-yl)-2,5-dihydropyrrolo[3,4-*c*]pyrrole-1,4-dione (**7**)<sup>S3</sup> and the polymer **PDPP4T**<sup>S4</sup> were synthesized according to literature procedures. (3,3'-difluoro-[2,2'-bithiophene]-5,5'-diyl)bis(trimethylstannane) (**2**) and 5,5'-bis(trimethylstannyl)-2,2'-bithiophene (**3**) were purchased from SunaTech Inc. <sup>1</sup>H-NMR and <sup>13</sup>C-NMR spectra were recorded at 400 MHz and 100 MHz on a Bruker AVANCE spectrometer with CDCl<sub>3</sub> as the solvent and tetramethylsilane (TMS) as the internal standard. Molecular weight was determined with GPC at 140 °C on a PL-GPC 220 system using a PL-GEL 10 µm MIXED-B column and *o*-DCB as the eluent against polystyrene standards. Low concentration of 0.1 mg mL<sup>-1</sup> polymer in *o*-DCB was applied to reduce aggregation. Optical absorption spectra were recorded on a

JASCO V-570 spectrometer with a slit width of 2.0 nm and a scan speed of 1000 nm min<sup>-1</sup>. Cyclic voltammetry was performed under an inert atmosphere at a scan rate of 0.1 V s<sup>-1</sup> and 1 M tetrabutylammonium hexafluorophosphate in acetonitrile as the electrolyte, a glassy-carbon working electrode coated with samples, a platinum-wire auxiliary electrode, and an Ag/AgCl as a reference electrode. The counter and reference electrodes were a Pt wire and Ag/AgCl, respectively.

The organic field-effect transistors were fabricated on a commercial Si/SiO<sub>2</sub>/Au substrate purchased from First MEMS Co. Ltd. A heavily N-doped Si wafer with a SiO<sub>2</sub> layer of 300 nm served as the gate electrode and dielectric layer, respectively. The Ti (2 nm)/Au (28 nm) source–drain electrodes were sputtered and patterned by a lift-off technique. Before deposition of the organic semiconductor, the gate dielectrics were treated with octadecyltrichlorosilane (OTS) in a vacuum oven at a temperature of 120 °C, forming an OTS self-assembled monolayers. The treated substrates were rinsed successively with hexane, chloroform, and isopropyl alcohol. Polymer thin films were spin coated on the substrate from solution with a thickness of around 30 – 50 nm. The devices were thermally annealed at the corresponding temperature in air for 10 min, cooled down and then moved into a glovebox filled with N<sub>2</sub>. The devices were measured on an Keithley 4200 SCS semiconductor parameter analyzer at room temperature. The mobilities were calculated from the saturation region with the following equation:  $I_{DS} = (W/2L)C_i\mu(V_G - V_T)^2$ , where  $I_{SD}$  is the drain–source current,  $W$  is the channel width (1400  $\mu$ m),  $L$  is the channel length (50  $\mu$ m),  $\mu$  is the field-effect mobility,  $C_i$  is the capacitance per unit area of the gate dielectric layer, and  $V_G$  and  $V_T$  are the gate voltage and threshold voltage, respectively. This equation defines the important characteristics of electron mobility ( $\mu$ ), on/off ratio ( $I_{on}/I_{off}$ ), and threshold voltage ( $V_T$ ), which could be deduced by the equation from the plot of current–voltage. Linear mobility was calculated according to the equation:  $I_{DS} = (W/L)C_i\mu(V_{GS} - V_T)V_{DS}$   $V_{DS} \ll V_{GS} - V_T$ .

Differential scanning calorimetry (DSC) was performed on a TA instruments calorimeter (Perkin Elmer Corp DSC8000) at a heating rate of 10 °C min<sup>-1</sup>. The second heating DSC scans are reported for all DPP polymers. 2D-GIWAXS measurements were performed at beamline 7.3.3 at the Advanced Light Source. Samples were prepared on Si substrates using blend solutions identical to those used in devices.<sup>S5</sup> The 10 keV X-ray beam was incident at a grazing angle of 0.13° - 0.17°, which maximized the scattering intensity from the samples. The scattered X-rays were detected using a Dectris Pilatus 2M photon counting detector.

## 2. Synthesis of the monomers and polymers

**2,5-bis(2-decyltetradecyl)-3-(4-methylthiophen-2-yl)-6-(thiophen-2-yl)-2,5-dihydropyrrolo[3,4-c]pyrrole-1,4-dione (5).** To a solution of **4** (3.0 g, 9.5 mmol), potassium carbonate (3.8 g, 27.5 mmol) and 18-crown-6 (10 mg) in DMF (30 mL) was added 2-decyltetradecyl bromide (9.5 g, 22.8 mmol). The reaction mixture was stirred at 130 °C for 10 h and then cooled to room temperature. After reaction, dichloromethane (100 mL) and water (100 mL) were added and the layers were separated. The organic layer was washed with brine. Then the solution was dried with anhydrous sodium sulfate and the solvent evaporated. The resulting solid was subjected to column chromatography (silica, eluent petroleum ether/dichloromethane, v/v = 4/1) to afford **5** (2.7 g, 29%) as red solid. <sup>1</sup>H NMR (400 MHz, CDCl<sub>3</sub>) δ (ppm) 8.85 (d, 1H), 8.70 (s, 1H), 7.60 (d, 1H), 7.24 (m, 1H), 7.21 (s, 1H), 4.01 (m, 4H), 2.37 (s, 3H), 1.91 (br, 2H), 1.21 (m, 80H), 0.88 (t, 12H). <sup>13</sup>C NMR (100 MHz, CDCl<sub>3</sub>) δ (ppm) 161.82, 161.72, 140.67, 140.05, 139.17, 137.23, 134.99, 130.21, 129.93, 129.54, 128.33, 126.60, 108.08, 107.71, 46.25, 37.74, 31.92, 31.26, 30.02, 29.65, 29.55, 29.35, 26.26, 22.68, 15.60, 14.09. MS (MALDI): calculated: 987.7, found: 987.9 (M<sup>+</sup>).

**3-(5-bromo-4-methylthiophen-2-yl)-6-(5-bromothiophen-2-yl)-2,5-bis(2-decyltetradecyl)-2,5-dihydropyrrolo[3,4-c]pyrrole-1,4-dione (6).** To a solution of **5** (0.30 g, 0.30 mmol), Cs<sub>2</sub>CO<sub>3</sub> (0.30 g, 0.92 mmol) in CHCl<sub>3</sub> (30 mL) was added dropwise bromine

solution (0.22 g, 1.38 mmol) in  $\text{CHCl}_3$  (5 mL) at 0 °C in dark. The reaction mixture was stirred at room temperature for 3 min. Sodium sulfite solution (5.0 g, 20 mL  $\text{H}_2\text{O}$ ) was added into reaction mixture and stirred for 30 min to remove bromine. The mixture was washed with brine and the layers were separated. The resulting solid was subjected to column chromatography (silica, eluent petroleum ether/dichloromethane, v/v = 4/1) to afford **6** as crude product. The solid was recrystallized from ethanol to afford pure **6** (0.27 g, 78 %) as a red solid.  $^1\text{H}$  NMR (400 MHz,  $\text{CDCl}_3$ )  $\delta$  (ppm) 8.60 (m, 2H), 7.21, (d, 1H), 3.91 (m, 4H), 2.29 (s, 3H), 1.88 (br, 2H), 1.22 (m, 80H), 0.86 (t, 12H).  $^{13}\text{C}$  NMR (100 MHz,  $\text{CDCl}_3$ )  $\delta$  (ppm) 161.40, 161.35, 139.76, 139.11, 139.00, 136.65, 135.10, 131.38, 131.26, 128.94, 118.70, 116.88, 108.16, 107.78, 99.99, 46.35, 37.76, 31.93, 31.25, 29.99, 29.69, 29.64, 29.56, 29.36, 26.24, 22.68, 15.17, 14.10. MS (MALDI): calculated: 1145.5, found: 1144.8 ( $\text{M}^+$ ).

**2,5-bis(2-decyltetradecyl)-3,6-bis(4-methylthiophen-2-yl)-2,5-dihydropyrrolo[3,4-c]pyrrole-1,4-dione (8).** To a solution of **7** (3.0 g, 9.1 mmol), potassium carbonate (3.8 g, 27.5 mmol) and 18-crown-6 (10 mg) in DMF (30 mL) was added 2-decyltetradecyl bromide (9.5 g, 22.8 mmol). The reaction mixture was stirred at 130 °C for 10 h and then cooled to room temperature. After reaction, dichloromethane (100 mL) and water (100 mL) were added and the layers were separated. The organic layer was washed with brine. Then the solution was dried with anhydrous sodium sulfate and the solvent evaporated. The resulting solid was subjected to column chromatography (silica, eluent petroleum ether/dichloromethane, v/v = 4/1) to afford **8** (3.0 g, 33%) as red solid.  $^1\text{H}$  NMR (400 MHz,  $\text{CDCl}_3$ )  $\delta$  (ppm) 8.68 (s, 2H), 7.20 (s, 2H), 4.00 (m, 4H), 2.37 (s, 6H), 1.91 (br, 2H), 1.21 (m, 80H), 0.85 (t, 12H).  $^{13}\text{C}$  NMR (100 MHz,  $\text{CDCl}_3$ )  $\delta$  (ppm) 161.78, 140.30, 139.13, 137.08, 129.59, 126.42, 107.79, 46.22, 37.71, 31.92, 31.28, 30.03, 29.70, 29.68, 29.65, 29.63, 29.56, 29.35, 26.29, 22.67, 15.60, 14.08. MS (MALDI): calculated: 1001.7, found: 1001.8 ( $\text{M}^+$ ).

**3,6-bis(5-bromo-4-methylthiophen-2-yl)-2,5-bis(2-decyltetradecyl)-2,5-dihydropyrrolo[3,4-c]pyrrole-1,4-dione (9).** To a solution of **8** (0.30 g, 0.30 mmol),  $\text{Cs}_2\text{CO}_3$

(0.30 g, 0.92 mmol) in  $\text{CHCl}_3$  (30 mL) was added dropwise bromine solution (0.22 g, 1.38 mmol) in  $\text{CHCl}_3$  (5 mL) at 0 °C in dark. The reaction mixture was stirred at room temperature for 3 min. Sodium sulfite solution (5.0 g, 20 mL  $\text{H}_2\text{O}$ ) was added into reaction mixture and stirred for 30 min to remove bromine. The mixture was washed with brine and the layers were separated. The resulting solid was subjected to column chromatography (silica, eluent petroleum ether/dichloromethane, v/v = 4/1) to afford **9** as crude product. The solid was recrystallized from ethanol to afford pure **9** (0.30 g, 86 %) as a red solid.  $^1\text{H}$  NMR (400 MHz,  $\text{CDCl}_3$ )  $\delta$  (ppm) 8.56 (s, 2H), 3.91 (m, 4H), 2.29 (s, 6H), 1.88 (br, 2H), 1.22 (m, 80H), 0.87 (t, 12H).  $^{13}\text{C}$  NMR (100 MHz,  $\text{CDCl}_3$ )  $\delta$  (ppm) 161.48, 139.39, 139.08, 136.45, 129.01, 116.67, 107.89, 46.35, 37.76, 31.92, 31.29, 30.00, 29.69, 29.64, 29.56, 29.35, 26.28, 22.68, 15.16, 14.09. MS (MALDI): calculated: 1159.5, found: 1158.8 ( $\text{M}^+$ ).

**PFDPP4T.** To a degassed solution of the **1** (64.50 mg, 0.057 mmol), **3** (30.09 mg, 0.057 mmol) in toluene (2 mL) and DMF (0.2 mL), tris(dibenzylideneacetene)dipalladium(0) (1.50 mg, 1.6  $\mu\text{mol}$ ) and triphenylphosphine (1.72 mg, 6.6  $\mu\text{mol}$ ) were added. The mixture was stirred at 115 °C for 24 h, after which it was precipitated in methanol and filter through a Soxhlet thimble. The polymer was extracted with acetone, hexane, dichloromethane and then dissolved in 1,1,2,2-tetrachloroethane (TCE) (80 mL) at 140 °C, which was then precipitated into acetone. Finally the resulting polymer can be solubilized in  $\text{CHCl}_3$  for device fabrication. Yield: 59.09 mg (88%) as a dark solid. GPC (*o*-DCB, 140 °C):  $M_n = 116.7 \text{ kg mol}^{-1}$ ,  $M_w = 326.6 \text{ kg mol}^{-1}$  and PDI = 2.80.

**PDPP4T-M.** Same procedure as for **PFDPP4T** but now **9** (87.55 mg, 0.076 mmol) and **2** (37.59 mg, 0.076 mmol) were used as the monomers. Yield: 84.3 mg (96%). GPC (*o*-DCB, 140 °C):  $M_n = 64.6 \text{ kg mol}^{-1}$ ,  $M_w = 151.0 \text{ kg mol}^{-1}$  and PDI = 2.34.

**PFDPP4T-M.** Same procedure as for **PFDPP4T** but now **8** (87.55 mg, 0.076 mmol) and **3** (40.35 mg, 0.076 mmol) were used as the monomers. Yield: 72.4 mg (85%). GPC (*o*-DCB, 140 °C):  $M_n = 69.8 \text{ kg mol}^{-1}$ ,  $M_w = 148.2 \text{ kg mol}^{-1}$  and PDI = 2.12.

**PDPP4T-2M.** Same procedure as for **PFDP4T** but now **6** (70.85 mg, 0.061 mmol) and **2** (30.06 mg, 0.061 mmol) were used as the monomers. Yield: 68.6 mg (96%). GPC (*o*-DCB, 140 °C):  $M_n = 40.4 \text{ kg mol}^{-1}$ ,  $M_w = 90.3 \text{ kg mol}^{-1}$  and PDI = 2.23.

**PFDP4T-2M.** Same procedure as for **PFDP4T** but now **6** (66.27 mg, 0.057 mmol) and **3** (30.17 mg, 0.057 mmol) were used as the monomers. Yield: 63.9 mg (93%). GPC (*o*-DCB, 140 °C):  $M_n = 86.1 \text{ kg mol}^{-1}$ ,  $M_w = 331.8 \text{ kg mol}^{-1}$  and PDI = 3.85.

### 3. Literature examples of fluorinated polymers for FETs

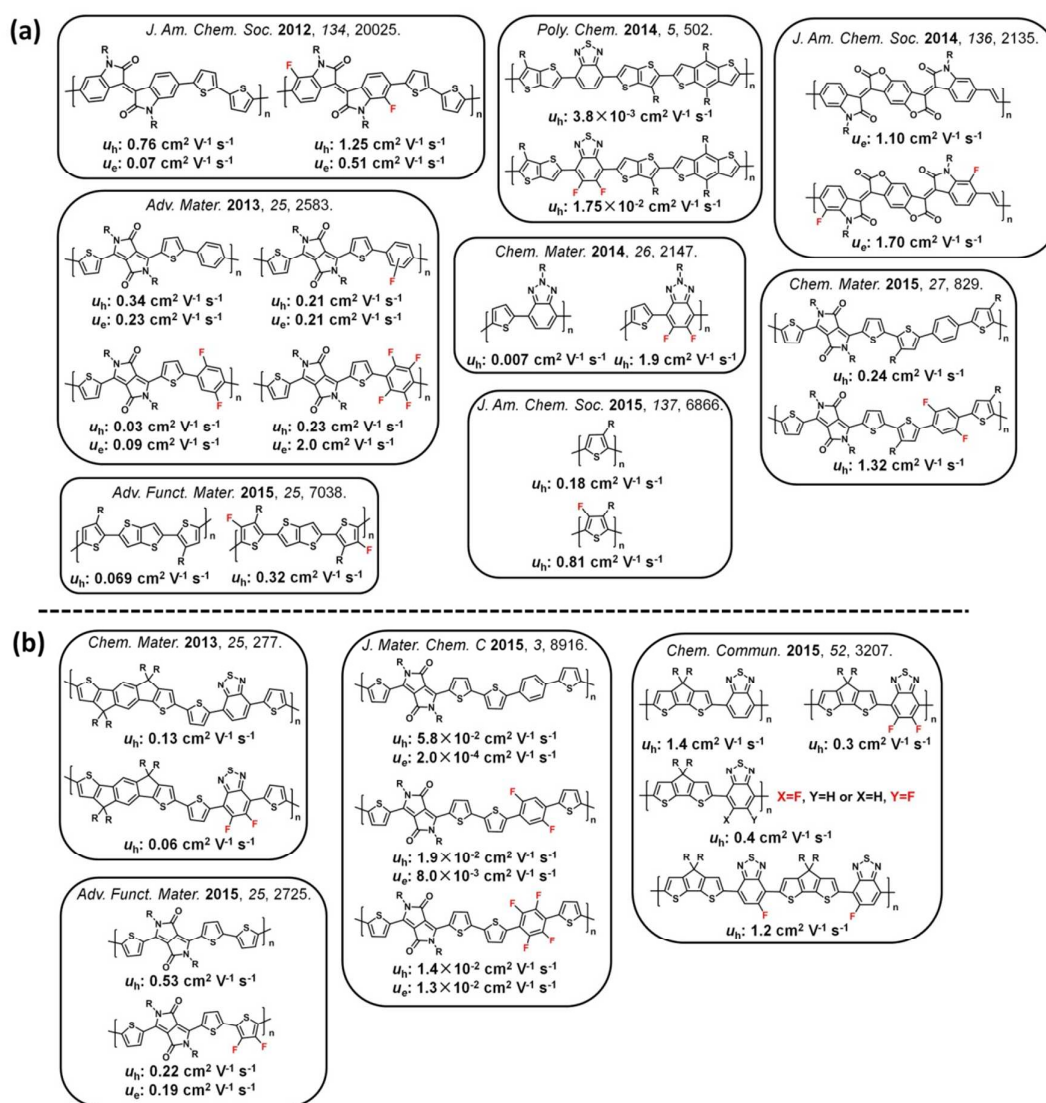

**Figure S1.** Literature examples of fluorinated conjugated polymers and their performance in FETs. (a) high mobility and (b) low mobility for fluorinated polymers compared to non-fluorinated polymers.

#### 4. The chemical structures of PDPP4T-M and PFDPP4T-M

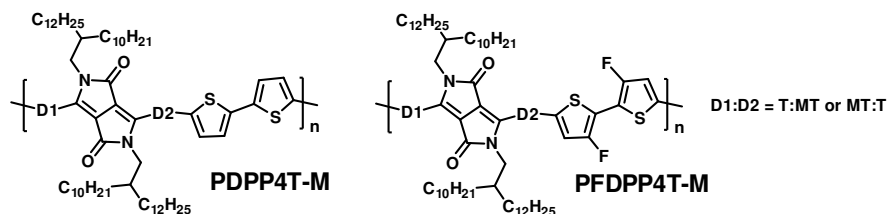

**Figure S2.** Chemical structures of the DPP polymers PDPP4T-M and PFDPP4T-M. T, thiophene; MT, methylthiophene.

#### 5. DFT Calculations

Density functional theory (DFT) calculations were performed at the B3LYP/6-31G\* level of theory by using the Gaussian 09 program package.

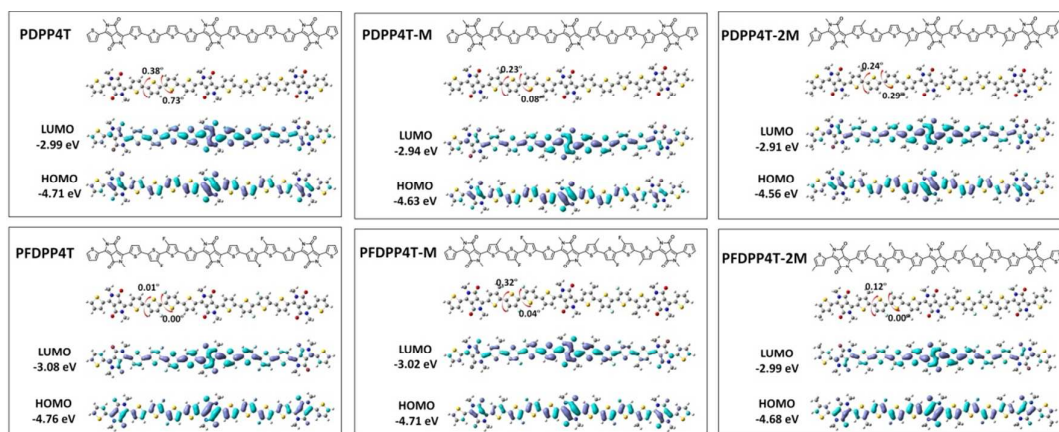

**Figure S3.** DFT frontier molecular orbitals and dihedral angle for the DPP polymers segment.

#### 6. CV of the polymers

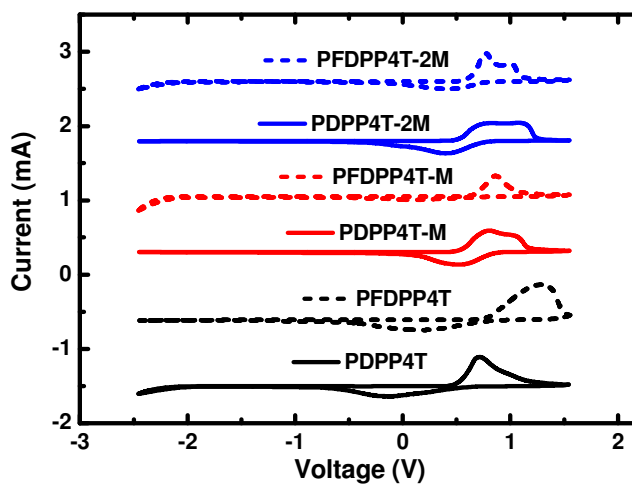



**Figure S4.** Cyclic voltammogram of the DPP polymer thin films. Potential vs. Fc/Fc<sup>+</sup>.

## 7. FETs

**Table S1.** Field effect hole mobilities of the DPP polymers in a BGBC configuration. The polymer thin films were thermally annealed (TA) for 10 min before measurement.

| Polymer   | TA              | $\mu_h$                                            | $V_T$ | $I_{on}/I_{off}$  |
|-----------|-----------------|----------------------------------------------------|-------|-------------------|
|           | [°C]            | [cm <sup>2</sup> V <sup>-1</sup> s <sup>-1</sup> ] | [V]   |                   |
| PDPP4T    | RT <sup>a</sup> | 1.4                                                | 7.1   | 1×10 <sup>5</sup> |
|           | 90              | 1.5                                                | -1.6  | 3×10 <sup>4</sup> |
|           | 120             | 6.2                                                | 0.5   | 1×10 <sup>6</sup> |
|           | 150             | 3.0                                                | 2.6   | 9×10 <sup>4</sup> |
|           | 180             | 2.8                                                | 0.1   | 1×10 <sup>6</sup> |
|           | 220             | 2.6                                                | -4.1  | 1×10 <sup>6</sup> |
| PFDPP4T   | RT <sup>a</sup> | 0.6                                                | -19.9 | 2×10 <sup>5</sup> |
|           | 90              | 1.8                                                | -10.1 | 2×10 <sup>5</sup> |
|           | 120             | 1.1                                                | -24.7 | 9×10 <sup>4</sup> |
|           | 150             | 1.4                                                | -10.5 | 1×10 <sup>5</sup> |
|           | 180             | 1.1                                                | -9.4  | 5×10 <sup>4</sup> |
|           | 220             | 1.5                                                | -11.4 | 1×10 <sup>6</sup> |
| PDPP4T-M  | RT              | 3.6                                                | 1.6   | 3×10 <sup>5</sup> |
|           | 90              | 4.2                                                | -0.3  | 7×10 <sup>4</sup> |
|           | 120             | 10.6                                               | 5.7   | 4×10 <sup>4</sup> |
|           | 150             | 3.0                                                | -0.5  | 9×10 <sup>7</sup> |
|           | 180             | 3.1                                                | -1.3  | 1×10 <sup>7</sup> |
|           | 220             | 2.5                                                | -5.1  | 2×10 <sup>7</sup> |
| PFDPP4T-M | RT <sup>a</sup> | 0.4                                                | -7.7  | 1×10 <sup>5</sup> |
|           | 90              | 1.2                                                | -4.0  | 6×10 <sup>4</sup> |
|           | 120             | 1.7                                                | -21.7 | 1×10 <sup>5</sup> |
|           | 150             | 0.8                                                | -14.3 | 2×10 <sup>7</sup> |
|           | 180             | 0.7                                                | -15.7 | 7×10 <sup>7</sup> |
|           | 220             | 0.6                                                | -11.9 | 7×10 <sup>5</sup> |

|            |                 |      |       |                 |
|------------|-----------------|------|-------|-----------------|
| PDPP4T-2M  | RT <sup>a</sup> | 1.3  | -2.4  | $3 \times 10^4$ |
|            | 90              | 3.6  | -13.4 | $8 \times 10^3$ |
|            | 120             | 11.2 | 0.3   | $7 \times 10^5$ |
|            | 150             | 4.3  | 0.9   | $1 \times 10^7$ |
|            | 180             | 3.2  | -8.8  | $6 \times 10^7$ |
|            | 220             | 3.8  | -3.3  | $9 \times 10^7$ |
| PFDPP4T-2M | RT <sup>a</sup> | 0.5  | -4.1  | $7 \times 10^3$ |
|            | 90              | 0.9  | -12.4 | $5 \times 10^3$ |
|            | 120             | 0.9  | -5.2  | $8 \times 10^3$ |
|            | 150             | 0.7  | -5.9  | $2 \times 10^5$ |
|            | 180             | 0.6  | -7.5  | $3 \times 10^5$ |
|            | 220             | 0.7  | -6.6  | $3 \times 10^5$ |

<sup>a</sup>Without thermal annealing.

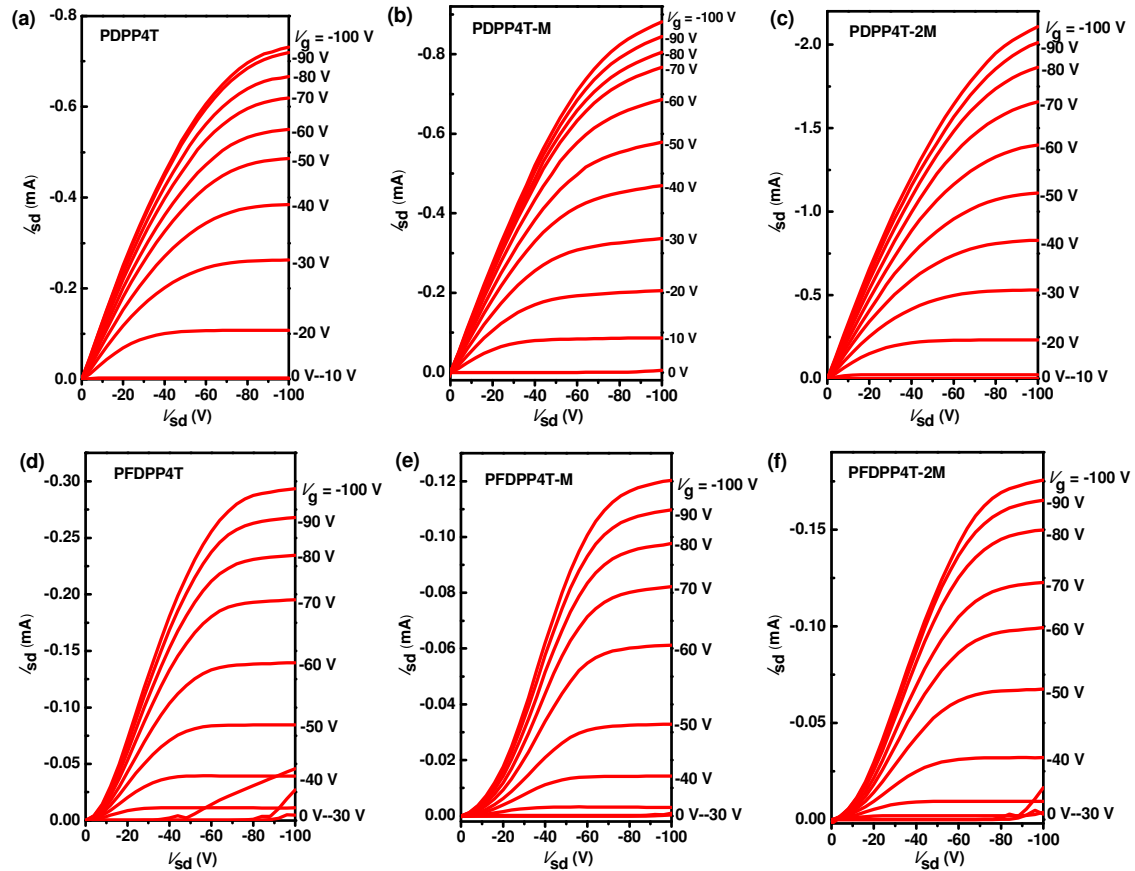

**Figure S5.** Output curves obtained from BGBC FET devices with DPP polymer thin films fabricated from  $\text{CHCl}_3$  with 10% *o*-DCB. (a) PDPP4T. (b) PDPP4T-M. (c) PDPP4T-2M. (d)

PFDPP4T. (e) PFDPP4T-M. (f) PFDPP4T-2M. (d) and (f) Thin films were annealed at 90 °C for 10 min. (a) – (c) and (e) Thin films were annealed at 120 °C for 10 min.

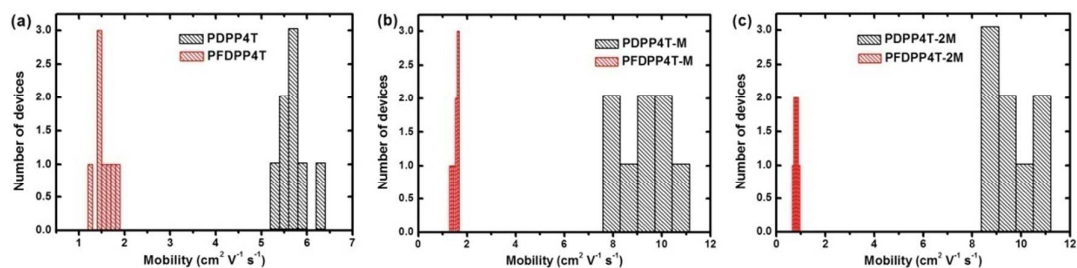

**Figure S6.** The mobility distribution for 8 FET devices based on the DPP polymers thin films spin coated from  $\text{CHCl}_3$  with 10% *o*-DCB.

## 8. AFM

Atomic force microscopy (AFM) images were recorded using a Digital Instruments Nanoscope IIIa multimode atomic force microscope in tapping mode under ambient conditions.

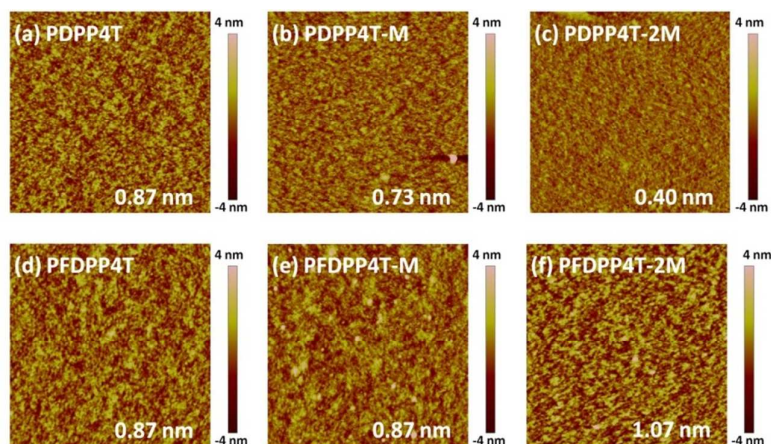

**Figure S7.** AFM height images ( $3 \times 3 \mu\text{m}^2$ ) of the DPP polymer thin films spin coated from  $\text{CHCl}_3$  with 10% *o*-DCB. (d), (f) Thermal annealed at 90 °C for 10 min. (a) – (c) and (e) Thermal annealed at 120 °C for 10 min. The root-mean-square (RMS) roughness is included in the images.

## 9. TGA of the DPP polymers

TGA measurement was performed on a Perkin-Elmer TGA-7 apparatus.

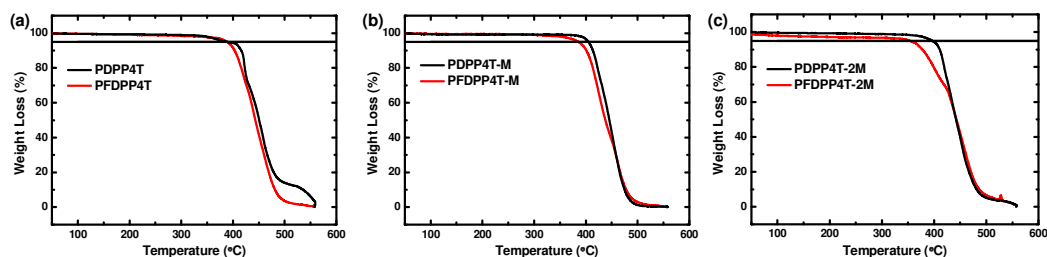

**Figure S8.** TGA plots of the DPP polymers with a heating rate of 10 °C/min under N<sub>2</sub> atmosphere. (a) PDPP4T and PFDPP4T. (b) PDPP4T-M and PFDPP4T-M. (c) PDPP4T-2M and PFDPP4T-2M. Temperatures with 5% weight loss for PDPP4T, PFDPP4T, PDPP4T-M, PFDPP4T-M, PDPP4T-2M and PFDPP4T-2M are 389, 389, 405, 386, 396 and 353 °C.

## 10. NMR spectra of the monomers and polymers

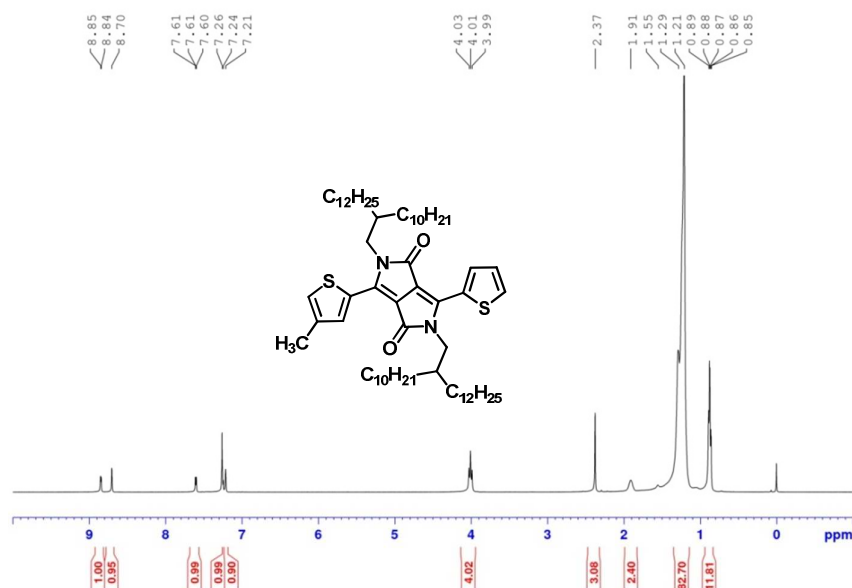

**Figure S9.** <sup>1</sup>H-NMR of the compound **5** recorded in CDCl<sub>3</sub>.

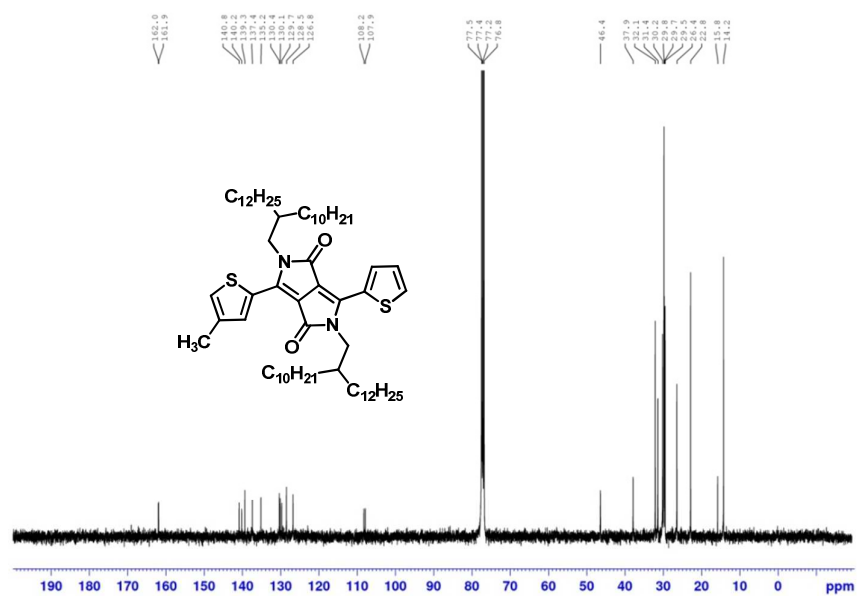

**Figure S10.**  $^{13}\text{C}$ -NMR of the compound **5** recorded in  $\text{CDCl}_3$ .

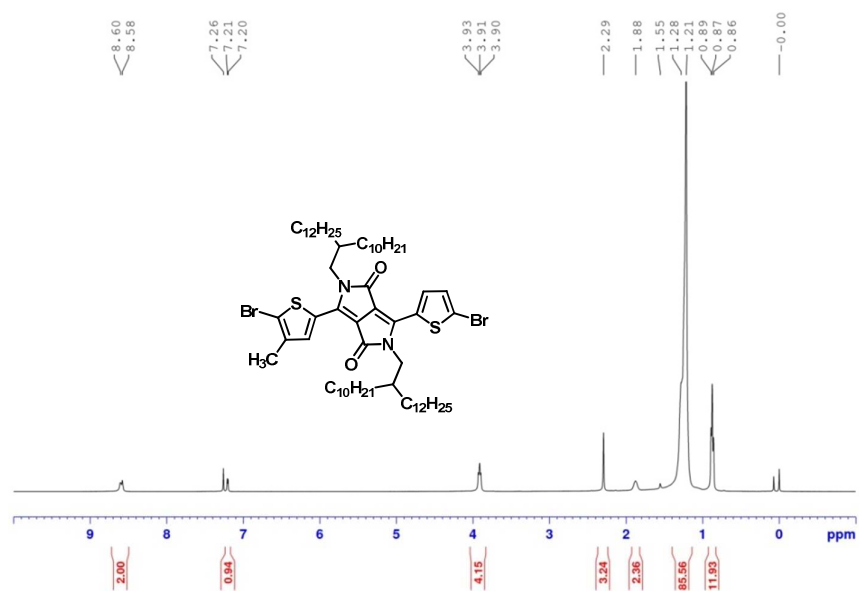

**Figure S11.**  $^1\text{H}$ -NMR of the compound **6** recorded in  $\text{CDCl}_3$ .

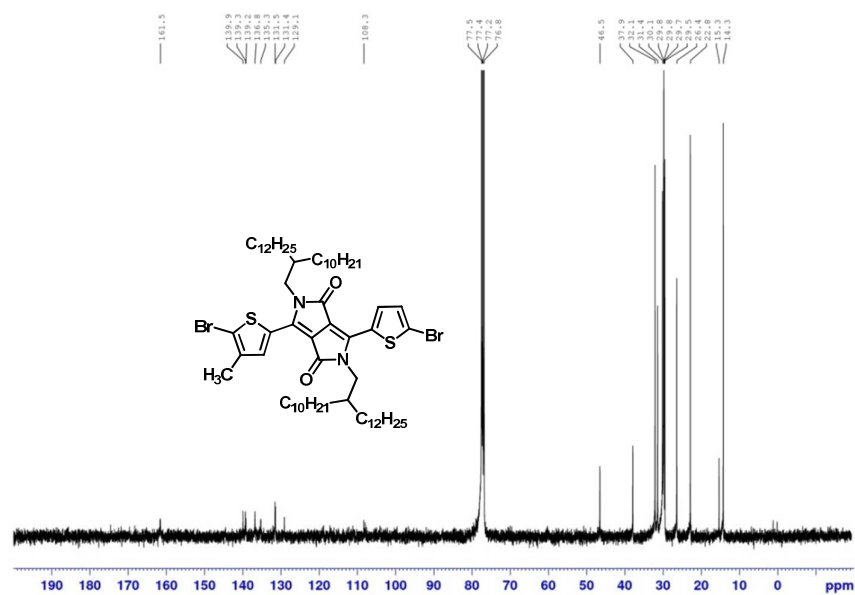

**Figure S12.** <sup>13</sup>C-NMR of the compound **6** recorded in CDCl<sub>3</sub>.

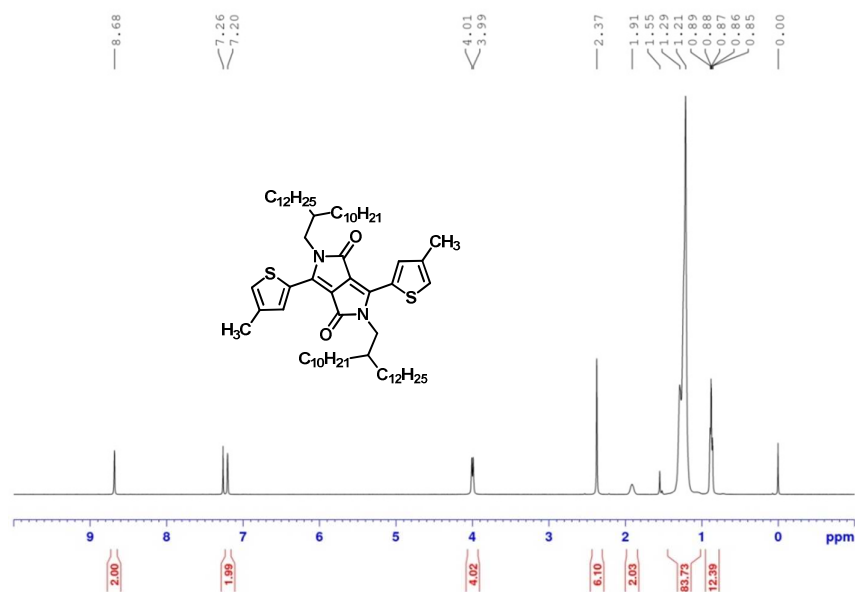

**Figure S13.** <sup>1</sup>H-NMR of the compound **8** recorded in CDCl<sub>3</sub>.

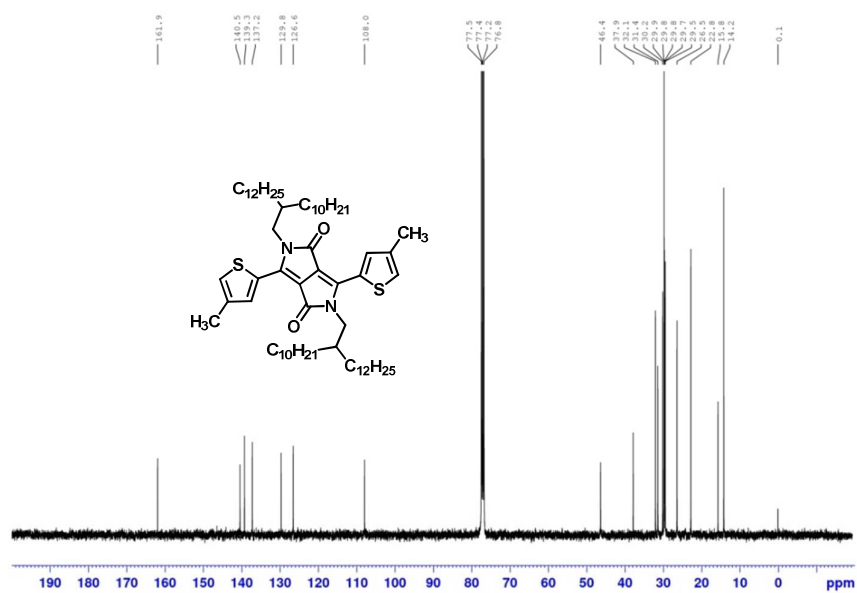

**Figure S14.**  $^{13}\text{C}$ -NMR of the compound **8** recorded in  $\text{CDCl}_3$ .

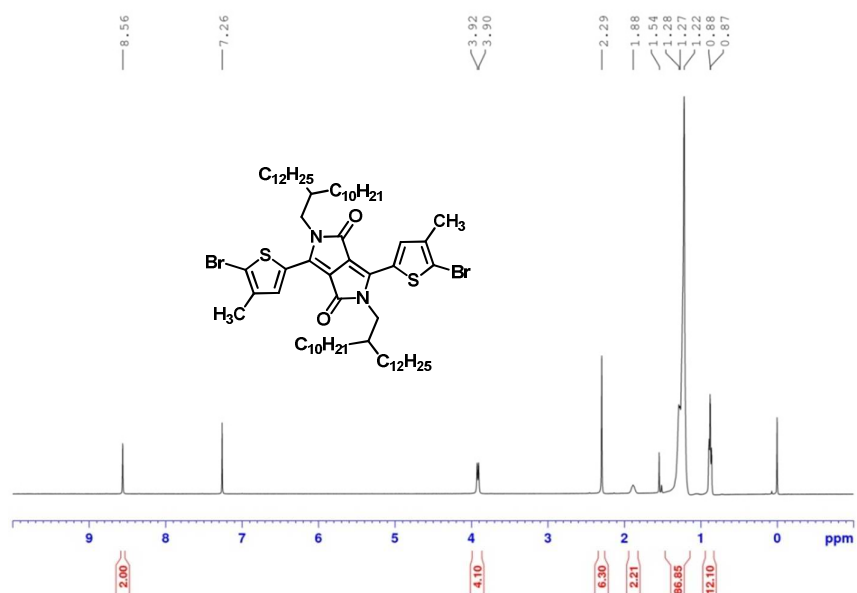

**Figure S15.**  $^1\text{H}$ -NMR of the compound **9** recorded in  $\text{CDCl}_3$ .

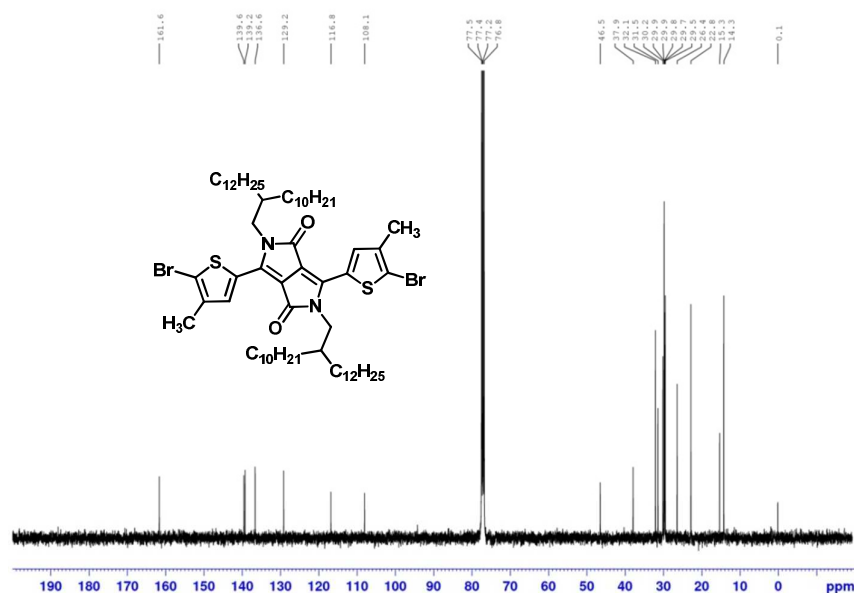

**Figure S16.** <sup>13</sup>C-NMR of the compound **9** recorded in CDCl<sub>3</sub>.

## 11. References

- S1. Cho, S.; Lee, J.; Tong, M. H.; Seo, J. H.; Yang, C., Poly(diketopyrrolopyrrole-benzothiadiazole) with Ambipolarity Approaching 100% Equivalency. *Adv. Funct. Mater.* **2011**, *21*, 1910-1916.
- S2. Li, W.; Furlan, A.; Hendriks, K. H.; Wienk, M. M.; Janssen, R. A. J., Efficient Tandem and Triple-Junction Polymer Solar Cells. *J. Am. Chem. Soc.* **2013**, *135*, 5529-5532.
- S3. Ji, Y.; Xiao, C.; Wang, Q.; Zhang, J.; Li, C.; Wu, Y.; Wei, Z.; Zhan, X.; Hu, W.; Wang, Z.; Janssen, R. A. J.; Li, W., Asymmetric Diketopyrrolopyrrole Conjugated Polymers for Field-Effect Transistors and Polymer Solar Cells Processed from a Nonchlorinated Solvent. *Adv. Mater.* **2016**, *28*, 943-950.
- S4. Li, W.; Hendriks, K. H.; Furlan, A.; Roelofs, W. S. C.; Wienk, M. M.; Janssen, R. A. J., Universal Correlation between Fibril Width and Quantum Efficiency in Diketopyrrolopyrrole-Based Polymer Solar Cells. *J. Am. Chem. Soc.* **2013**, *135*, 18942-18948.
- S5. Alexander, H.; Wim, B.; James, G.; Eric, S.; Eliot, G.; Rick, K.; Alastair, M.; Matthew, C.; Bruce, R.; Howard, P., A SAXS/WAXS/GISAXS Beamline with Multilayer Monochromator. *J. Phys. Conf. Ser.* **2010**, *247*, 012007.
